# Supplementary material for: The Prebiotic Potential of Geraniin and Geraniin-Enriched Extract against High-Fat-Diet-Induced Metabolic Syndrome in Sprague Dawley Rats
Source: MDPI journal article supplement (doi:10.3390/antiox11040632), 2022-03-25
Supplement: s1 [file s1]

**Table S1.** Composition of macronutrient and ingredients of AIN93G diet.

| Macronutrient  | Normal diet (D10012GR) |            | High-fat diet (D12033001) |            |
|----------------|------------------------|------------|---------------------------|------------|
|                | Mass, g%               | kcal, %    | Mass, g%                  | kcal, %    |
| Protein        | 20                     | 20         | 27                        | 20         |
| Carbohydrate   | 64                     | 64         | 27                        | 20         |
| Fat            | 7                      | 16         | 35                        | 60         |
| <b>Total</b>   |                        | <b>100</b> |                           | <b>100</b> |
| <b>Kcal/gm</b> | <b>4.0</b>             |            | <b>5.3</b>                |            |

  

| Ingredient          | Mass, g        | kcal        | Mass, g      | kcal        |
|---------------------|----------------|-------------|--------------|-------------|
| Casein              | 200            | 800         | 200          | 800         |
| L-Cystine           | 3              | 12          | 3            | 12          |
| Corn starch         | 397.486        | 1590        | 0            | 0           |
| Maltodextrin 10     | 132            | 528         | 123.8        | 495         |
| Sucrose             | 100            | 400         | 68           | 272         |
| Cellulose, BW200    | 50             | 0           | 50           | 0           |
| Soybean oil         | 70             | 630         | 25           | 225         |
| Lard                | 0              | 0           | 239.5        | 2156        |
| t-Butylhydroquinone | 0.014          | 0           | 0            | 0           |
| Mineral Mix S10022G | 35             | 0           | 35           | 0           |
| Vitamin Mix V10037  | 10             | 40          | 10           | 40          |
| Choline Bitartrate  | 2.5            | 0           | 2.5          | 0           |
| <b>Total</b>        | <b>1000.05</b> | <b>4000</b> | <b>756.8</b> | <b>4000</b> |

**Table S2.** Accession numbers, forward and reverse primers of the reference and target genes.

| Target and reference genes                                        | Accession Number | Primer sequence                                                |
|-------------------------------------------------------------------|------------------|----------------------------------------------------------------|
| Tumour Necrosis Factor alpha (Tnf $\alpha$ )                      | NM_012675        | 5'-GTCTTTGAGATCCATGCCATTG-3'<br>5'-AGACCCTCACACTCAGATCA-3'     |
| Interleukin 6 (IL-6)                                              | NM_012589        | 5'-CCTTCTGTGACTCTAACTTCTCC-3'<br>5'-CAGAGCAATACTGAAACCCTAGT-3' |
| Interleukin 1 beta (IL-1 $\beta$ )                                | NM_031512        | 5'-TTGTCGTTGCTTGTCTCTCC-3'<br>5'-GTGCTGTCTGACCCATGT-3'         |
| Peroxisome proliferator-activated receptor gamma (PPAR $\gamma$ ) | NM_001145366     | 5'-GGACGCTGAAGAAGAGACCTG-3'<br>5'-CCGGGTCCTGTCTGAGTATG-3'      |
| Peroxisome proliferator-activated receptor alpha (PPAR $\alpha$ ) | NM_013196        | 5'-TCACACAATGCAATCCGTTT-3'<br>5'-GGCCTTGACCTTGTTTATGT-3'       |
| Glyceraldehyde 3-phosphate dehydrogenase (GAPDH)                  | NM_017008        | 5'-TCACCACCATGGAGAAGGC-3'<br>5'-GCTAAGCAGTTGGTGGTGCA-3'        |
| Lactate dehydrogenase (LDHA)                                      | NM_017025        | 5'-GTTGTTGGGGTTGGTGCTGTT-3'<br>5'-CCACTGGGTTTGAGACGATGA-3'     |

Table S3. List of compounds in GEE.

| m/z       | Formula           | Label                                                   | Mass      | Base Peak | RT     |
|-----------|-------------------|---------------------------------------------------------|-----------|-----------|--------|
| 554.0714  |                   | Cpd 5: 4.372                                            | 1110.1574 | 554.0714  | 4.372  |
| 577.1618  | C33 H26 N2 O8     | Cpd 4: C33 H26 N2 O8                                    | 578.1693  | 577.1618  | 4.305  |
| 633.0966  | C27 H24 N O17     | Cpd 2: C27 H24 N O17                                    | 634.1039  | 633.0966  | 4.228  |
| 649.4176  | C32 H56 N7 O7     | Cpd 24: C32 H56 N7 O7                                   | 650.4248  | 649.4176  | 22.88  |
| 666.4066  | C30 H49 N15 O3    | Cpd 25: C30 H49 N15 O3                                  | 667.4137  | 666.4066  | 22.881 |
| 781.4515  |                   | Cpd 12: 21.668                                          | 782.4588  | 781.4515  | 21.668 |
| 785.1016  | C37 H30 N4 O10 S3 | Cpd 7: CI Acid red 114                                  | 786.1093  | 785.1016  | 4.997  |
| 795.4643  |                   | Cpd 11: 21.582                                          | 796.4716  | 795.4643  | 21.582 |
| 798.4412  | C38 H69 N O14     | Cpd 13: 14-Hydroxy-6-O-methylerythromycin A             | 763.4719  | 798.4412  | 21.668 |
| 812.453   |                   | Cpd 10: 21.582                                          | 813.4603  | 812.453   | 21.582 |
| 823.4569  |                   | Cpd 26: 23.635                                          | 824.4642  | 823.4569  | 23.635 |
| 923.5029  | C45 H82 O15 P2    | Cpd 9: CL(1'-[18:2(9Z,12Z)/0:0],3'-[18:2(9Z,12Z)/0:0])  | 924.5099  | 923.5029  | 21.511 |
| 923.5031  | C45 H82 O15 P2    | Cpd 21: CL(1'-[18:2(9Z,12Z)/0:0],3'-[18:2(9Z,12Z)/0:0]) | 924.5102  | 923.5031  | 22.479 |
| 923.5046  | C45 H82 O15 P2    | Cpd 17: CL(1'-[18:2(9Z,12Z)/0:0],3'-[18:2(9Z,12Z)/0:0]) | 924.5116  | 923.5046  | 21.818 |
| 951.0773  | C41 H28 O27       | Cpd 3: Geraniin                                         | 952.0848  | 951.0773  | 4.254  |
| 953.0908  | C41 H30 O27       | Cpd 8: Chebulagic acid                                  | 954.0972  | 953.0908  | 5.04   |
| 959.4779  | C45 H82 O15 P2    | Cpd 15: CL(1'-[18:2(9Z,12Z)/0:0],3'-[18:2(9Z,12Z)/0:0]) | 924.508   | 959.4779  | 21.812 |
| 959.4779  | C45 H82 O15 P2    | Cpd 18: CL(1'-[18:2(9Z,12Z)/0:0],3'-[18:2(9Z,12Z)/0:0]) | 924.5081  | 959.4779  | 22.031 |
| 969.505   | C49 H78 O19       | Cpd 22: Calendulose H methyl ester                      | 970.512   | 969.505   | 22.479 |
| 969.5072  | C49 H78 O19       | Cpd 14: Calendulose H methyl ester                      | 970.514   | 969.5072  | 21.812 |
| 969.5079  | C49 H78 O19       | Cpd 19: Calendulose H methyl ester                      | 970.5147  | 969.5079  | 22.033 |
| 971.1004  |                   | Cpd 1: 3.856                                            | 972.1077  | 971.1004  | 3.856  |
| 986.4944  |                   | Cpd 23: 22.480                                          | 987.5016  | 986.4944  | 22.48  |
| 986.4953  |                   | Cpd 16: 21.813                                          | 987.5025  | 986.4953  | 21.813 |
| 986.4958  |                   | Cpd 20: 22.034                                          | 987.5031  | 986.4958  | 22.034 |
| 1011.5121 |                   | Cpd 27: 24.105                                          | 1012.5193 | 1011.5121 | 24.105 |
| 1028.4997 |                   | Cpd 28: 24.106                                          | 1029.507  | 1028.4997 | 24.106 |
| 1109.0846 |                   | Cpd 6: 4.375                                            | 1110.0918 | 1109.0846 | 4.375  |

Mass-to-charge ratio (m/z), retention time (RT).

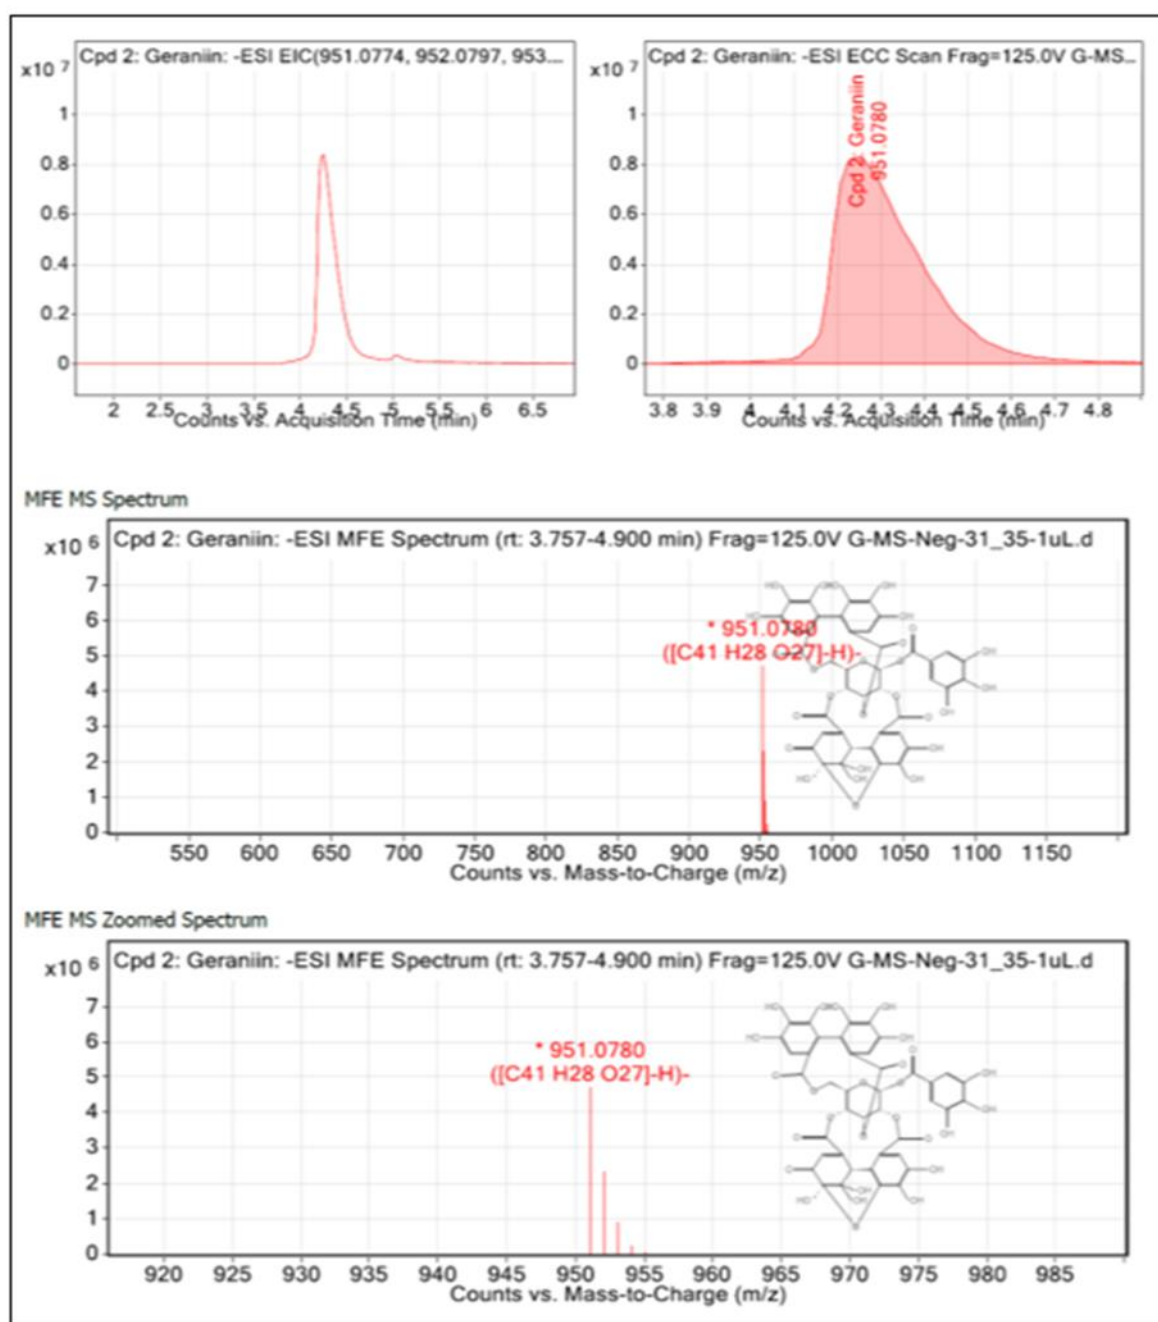

**Figure S1.** Identification of geraniin using LCMS. Mass spectrum shows molecular ion for geraniin  $C_{41}H_{27}O_{27}$  which was detected at negative mode with  $m/z$  951.0780

**Table S4.** List of compounds in GE.

| $m/z$    | Formula              | Label                  | Mass     | Base Peak | RT    |
|----------|----------------------|------------------------|----------|-----------|-------|
| 951.078  | $C_{41}H_{28}O_{27}$ | Cpd 2: Geraniin        | 952.0852 | 951.078   | 4.272 |
| 953.09   | $C_{41}H_{30}O_{27}$ | Cpd 3: Chebulagic acid | 954.0965 | 953.0899  | 5.049 |
| 971.1004 |                      | Cpd 1: 3.853           | 972.1077 | 971.1004  | 3.853 |

Mass-to-charge ratio ( $m/z$ ), retention time (RT).

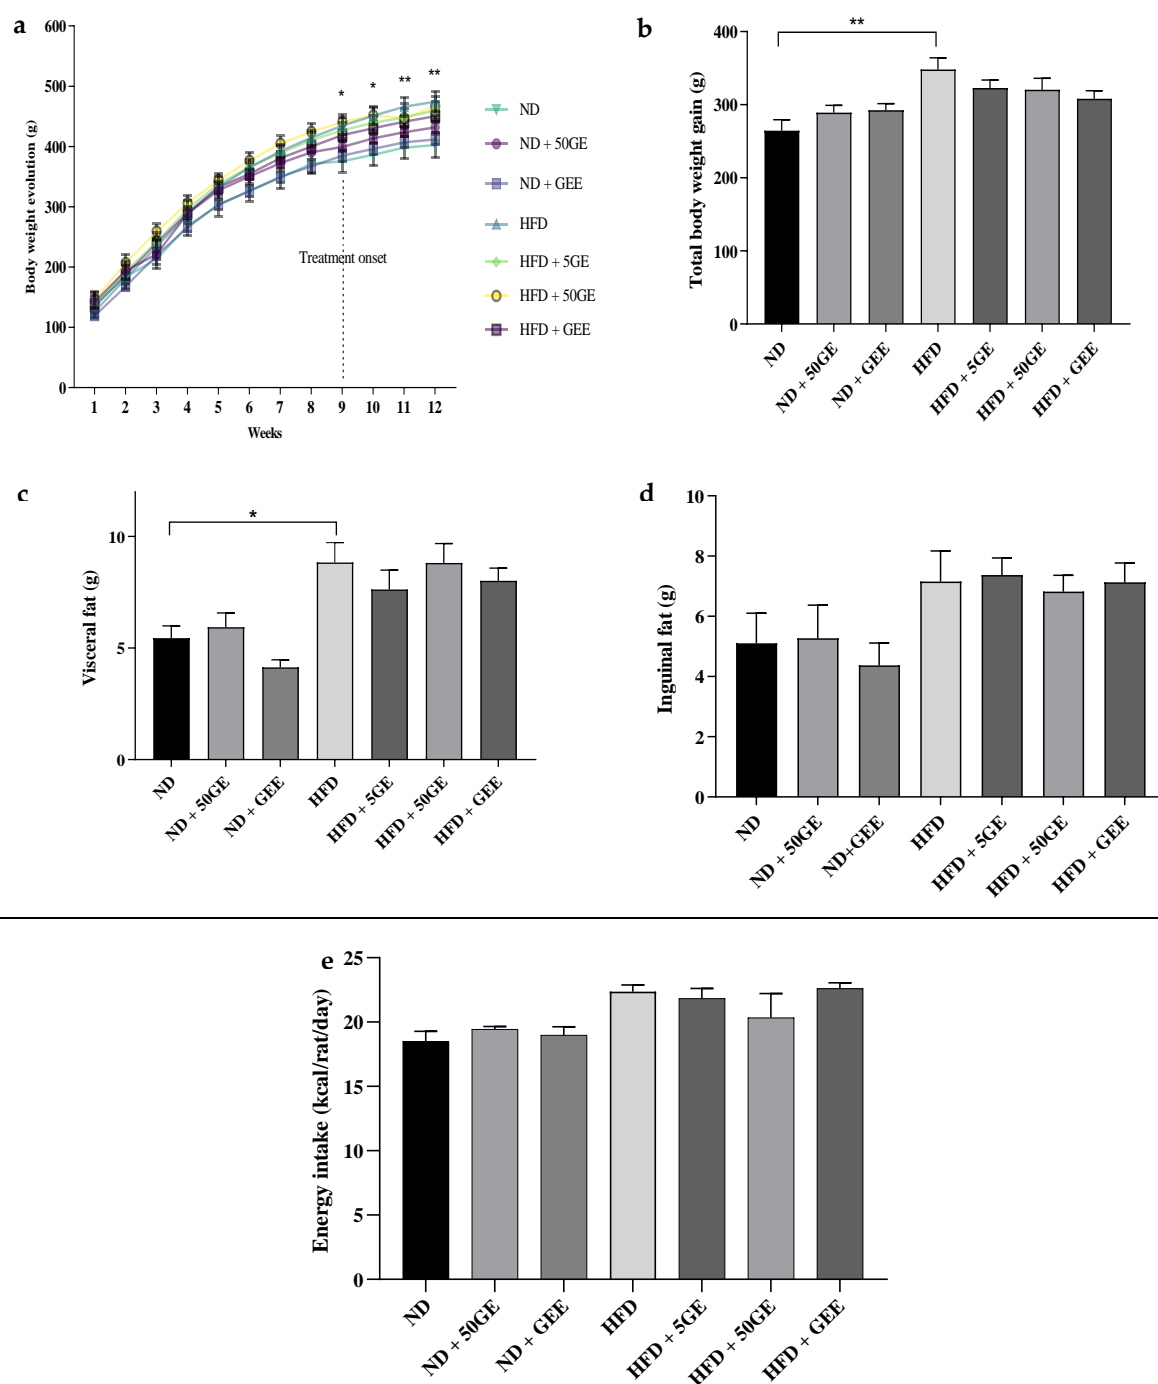

**Figure S2.** Body weight, adiposity and energy intake. Effect of geraniin and GEE in ND and HFD-fed rats. (a) Bodyweight evolution, (b) Total body weight gain, (c) Visceral adipose tissue (VAT), (d) Inguinal adipose tissue (IAT), (e) Energy intake. Sample size,  $n = 6$ . \*  $p < 0.05$ , \*\*  $p < 0.005$  HFD compared to ND.

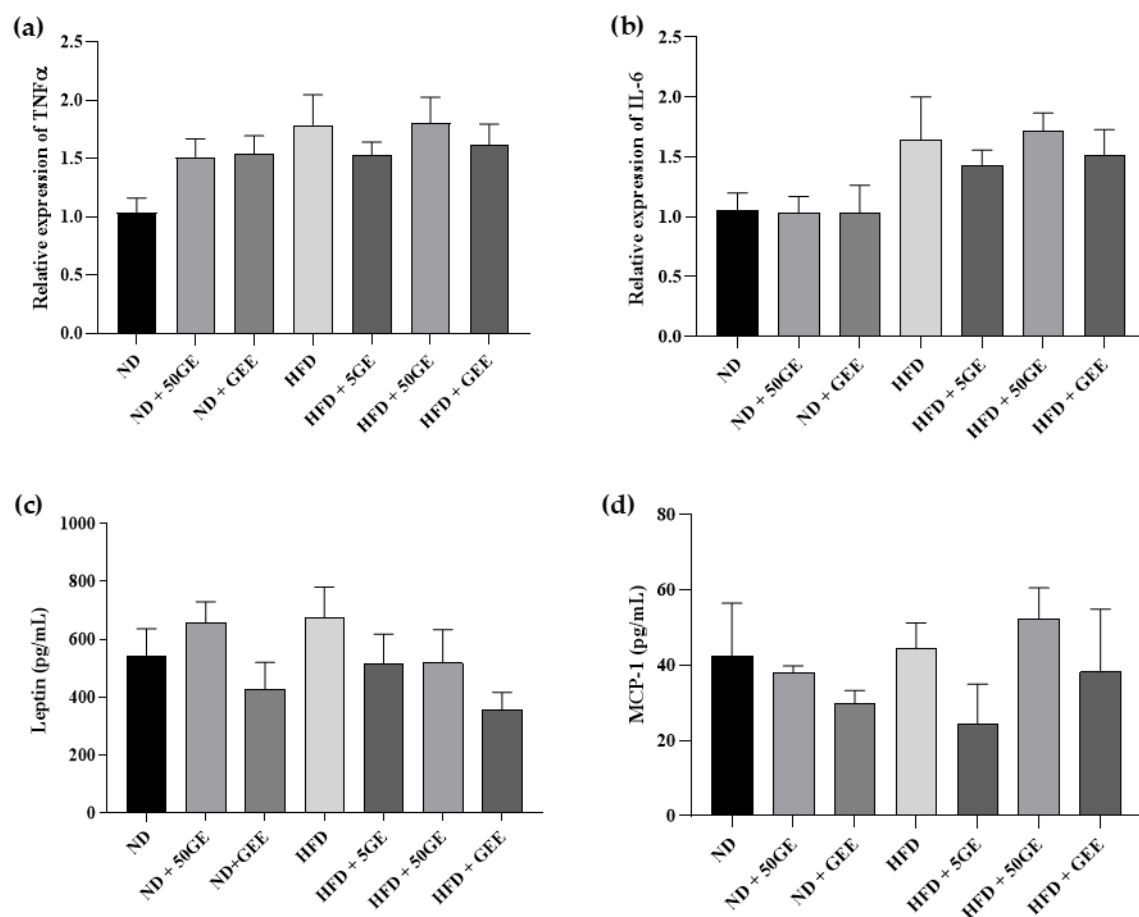

**Figure S3.** Plasma cytokines and hepatic inflammatory genes. Effect of geraniin and GEE on plasma cytokines and hepatic inflammatory genes in ND and HFD-fed rats. (a) (c) TNF $\alpha$ , (d) IL 6 (c) Leptin, (d) Monocyte chemo-attractant protein 1 (MCP 1). Sample size, n = 4 to 6

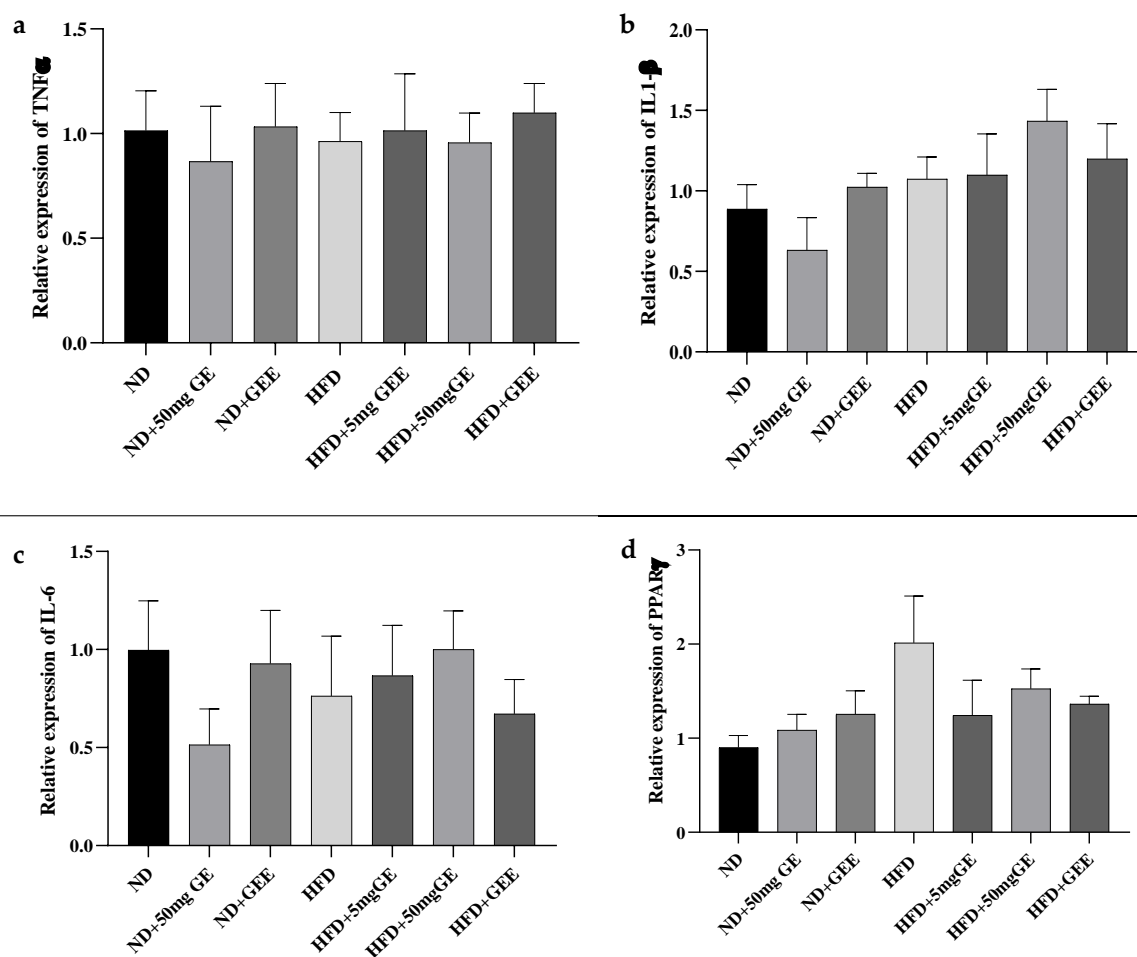

**Figure S4.** The relative expression of inflammatory genes and PPAR $\gamma$  in rWAT. Relative expression of inflammatory genes in rWAT (a) TNF $\alpha$  (b) IL-1 $\beta$  (c) IL-6, (d) PPAR $\gamma$ . Sample size, n = 5 to 8. No significant difference between groups

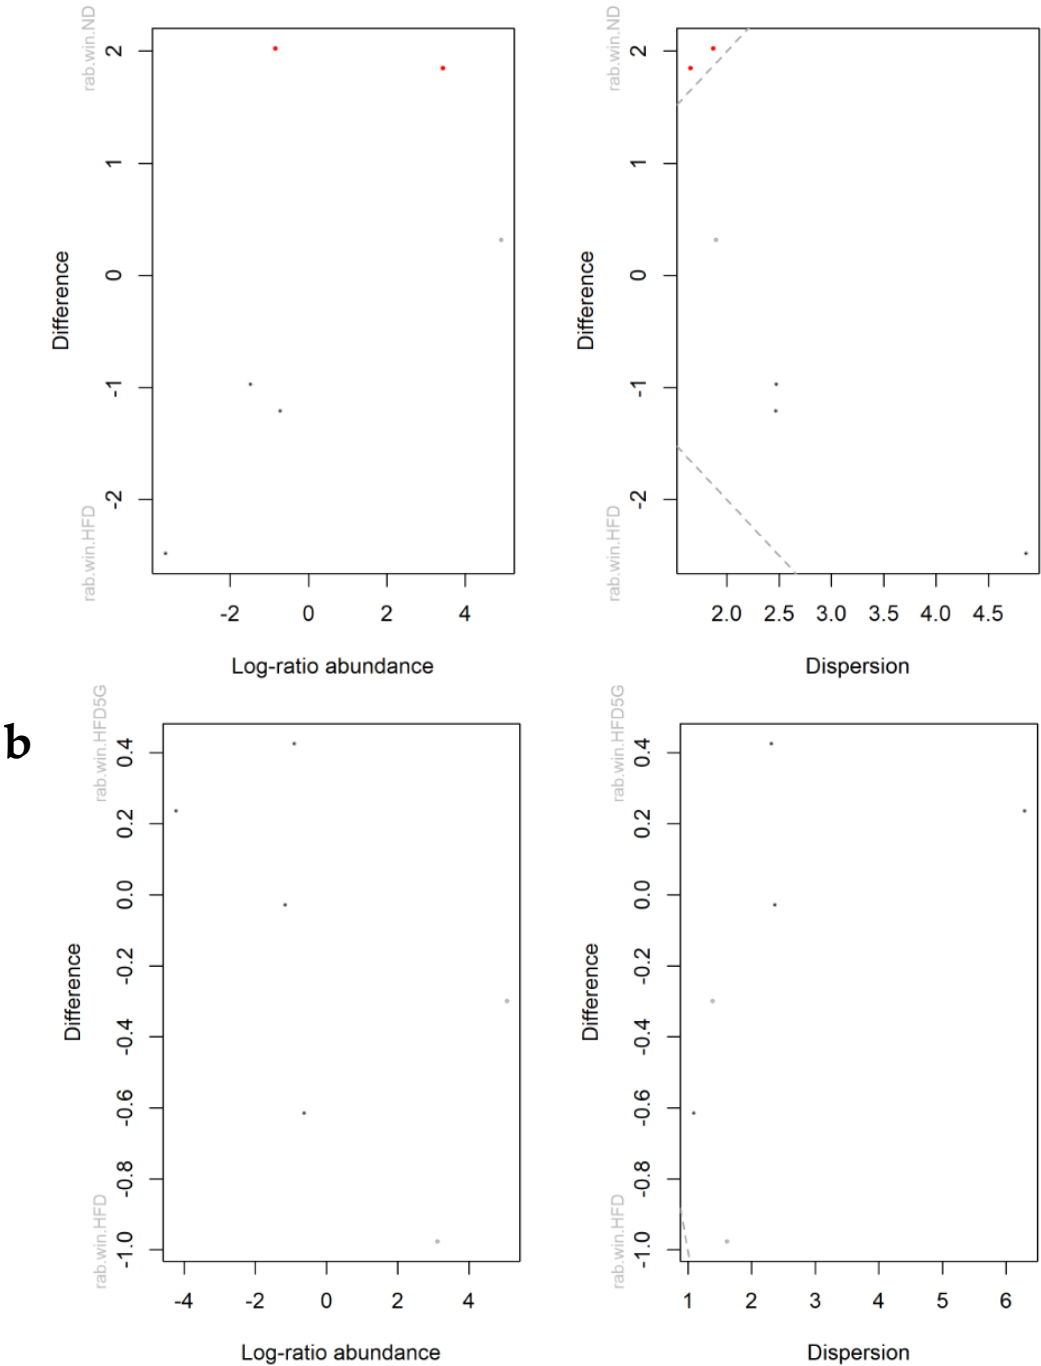

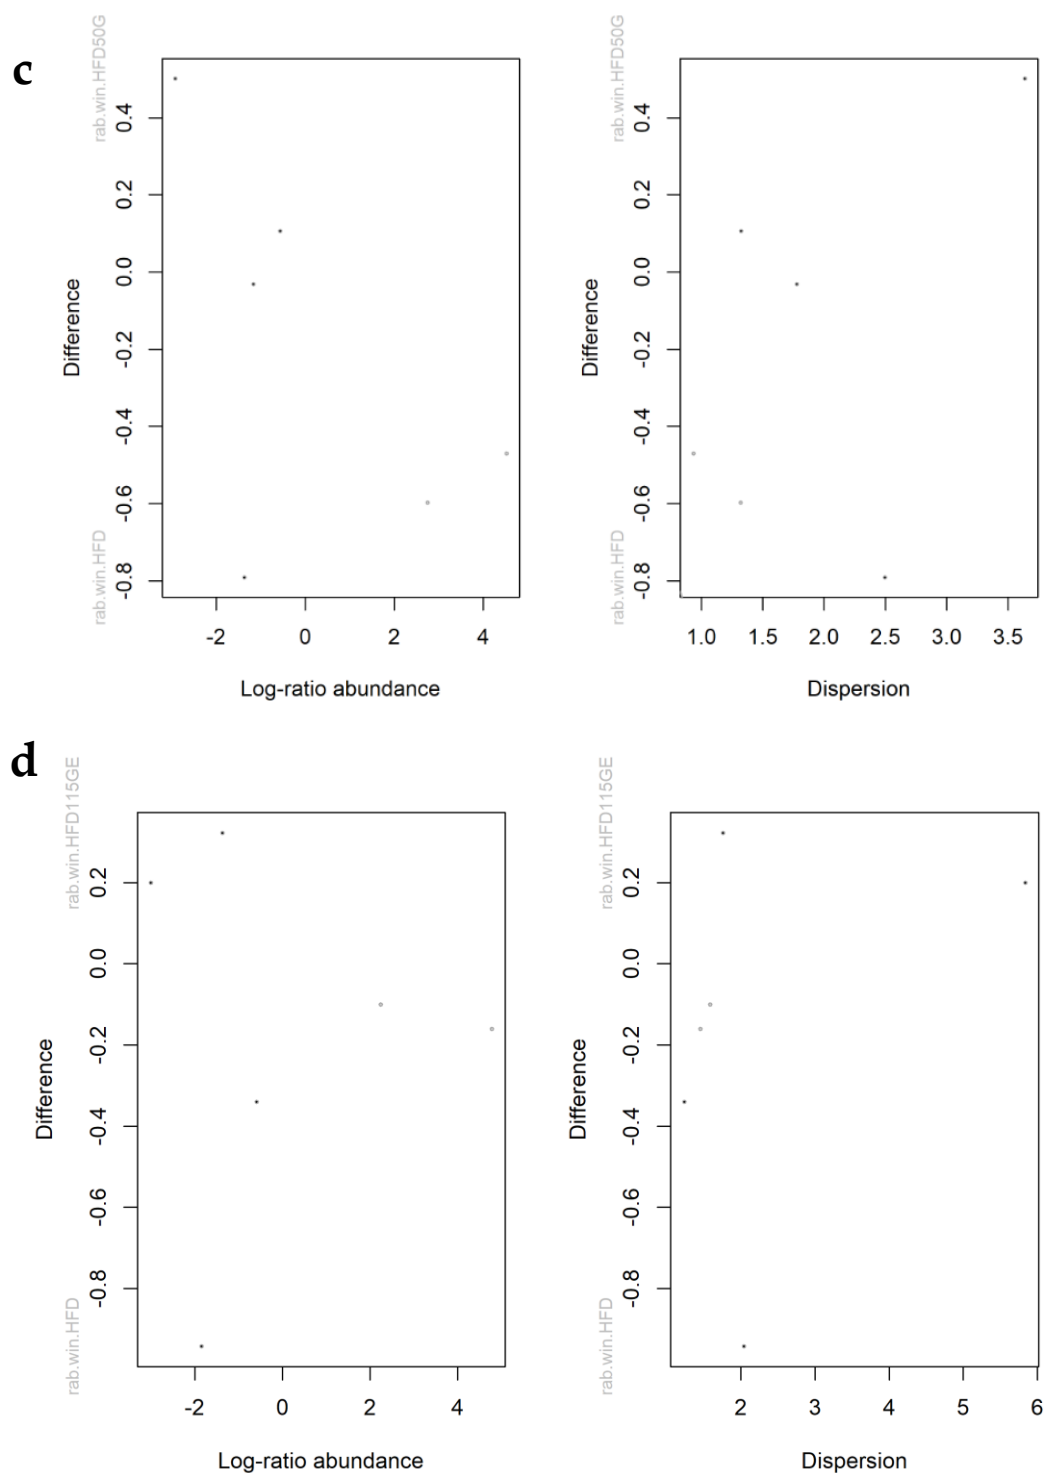

**Figure S5.** MA and effect plots to determine the significance of phyla between groups. MA and effect plots following ALDEx2 analysis to determine significance at phyla level between (a) HFD vs ND, (b) HFD vs HFD + 5GE, (c) HFD + 50GE, (d) HFD + 115GEE. A significant difference between HFD and ND was detected at the phyla level (red dots) following the Benjamini–Hochberg correction for false-positive rate
